# Supplementary material
Source: PubMed Central journal article supplement (PMC6728920)
Supplement: NIHMS1048878-supplement-Figure_S1.pdf [file NIHMS1048878-supplement-Figure_S1.pdf]

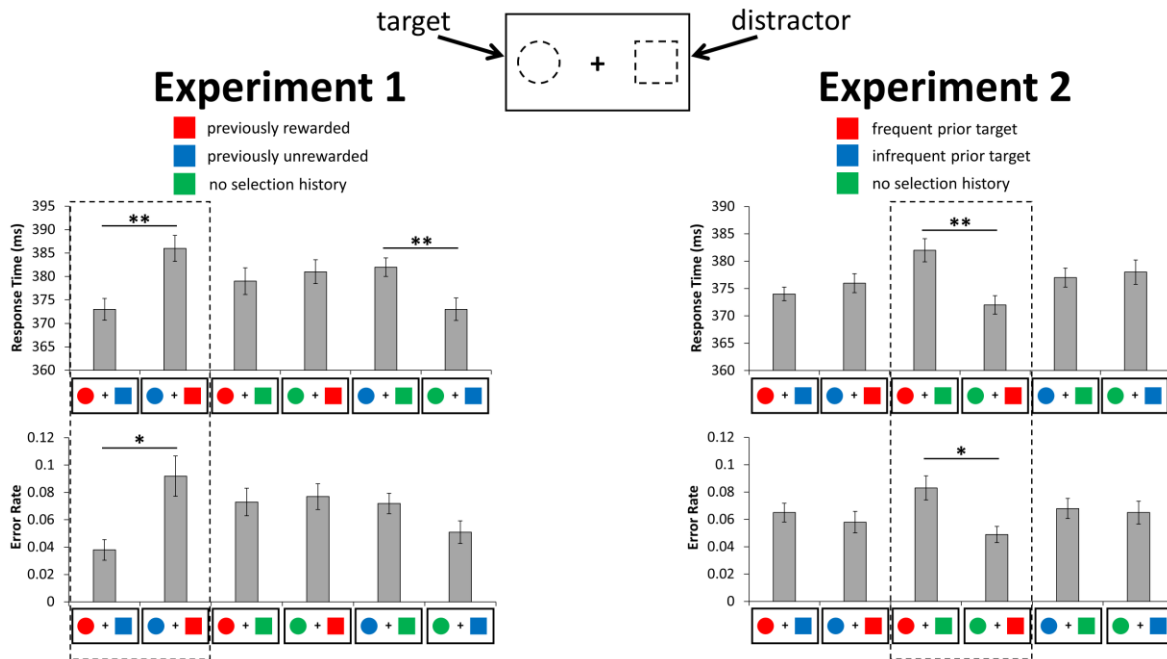

**Figure S1. Response time and error rate broken down for all possible color pairings for the test phase of Experiment 1 and 2. Related to Figure 3.** Error bars reflect the within-subjects SEM. Statistical significance is indicated for the three pairwise comparisons involving the three possible color pairings (\* $p < 0.02$ , \*\* $p < 0.01$ ). For each of the two dependent measures, the interaction between experiment and trial type was significant ( $p < 0.008$ ). The rectangular box with dotted lines highlights the comparison that isolates the effect of one variable (presence vs absence: reward history in Experiment 1 and prior target status in Experiment 2) while controlling for the other.
